# Supplementary material for: Analysis of Relationship Between Grain Yield and NDVI From MODIS in the Fez-Meknes Region, Morocco
Source: Preprints.org preprint supplement (doi:10.20944/preprints202304.0479.v1), 2023-04-18
Supplement: Supplementary file 1 [file supplementary]

## Sheet: c, correlation
	18 Dec	26 Dec	03 Jan	08 Jan	16 Jan	24 Jan	01 Feb	09 Feb	17 Feb	25 Feb	05 Mars	13 Mars	21 Mars	29 Mars	06 Apr	14 Apr	22 Apr	30 Apr	08 May	16 May	24 May	01 Jun
Meknes	0.324067	0.39684	0.365335	0.503243	0.637625	0.578352	0.647822	0.550604	0.656219	0.659518	0.696693	0.732573	0.685973	0.811161	0.783966	0.698909	0.593944	0.399024	0.168318	0.140376	0.199805	0.264037
Mly Yaacoub	0.419038	0.493727	0.488004	0.587246	0.678974	0.664272	0.763482	0.751137	0.777074	0.782984	0.803083	0.836334	0.824038	0.850783	0.836724	0.759378	0.572607	0.590764	0.337895	0.322482	0.367976	0.378561
Taza	0.354634	0.455627	0.589614	0.572177	0.722218	0.705567	0.757854	0.792289	0.889101	0.818851	0.865147	0.851483	0.829737	0.825303	0.739891	0.712506	0.573354	0.324211	0.20169	0.0501638	0.144641	0.0577743
Taounate	0.317717	0.480094	0.458972	0.539905	0.711525	0.679132	0.775612	0.752458	0.790312	0.826003	0.848006	0.893029	0.877469	0.84091	0.757506	0.745418	0.495813	0.341497	0.203972	-0.114394	0.123459	0.120628
El Hajeb	0.137534	0.195209	0.226422	0.323883	0.3038	0.385923	0.595974	0.70317	0.765538	0.717051	0.747223	0.698799	0.695159	0.684369	0.698799	0.747065	0.622823	0.561102	0.419468	0.316158	0.291384	0.256451
Sefrou	0.275721	0.296725	0.351455	0.453226	0.515458	0.467411	0.557128	0.631279	0.6	0.607587	0.714909	0.698678	0.743524	0.757502	0.821309	0.759079	0.643385	0.573625	0.230082	0.209489	0.227171	0.195592
Boulmane	0.336918	-0.154511	0.0672599	0.343318	0.43671	0.206137	0.463234	0.461341	0.408237	0.226437	0.566104	0.578811	0.570923	0.618716	0.611912	0.640612	0.712817	0.606481	0.645342	0.620355	0.733957	0.549009
Ifrane	0.111218	-0.0107154	0.295663	0.301612	0.37358	0.332894	0.311141	0.285257	0.156814	0.322568	0.592029	0.620559	0.565062	0.533802	0.715438	0.571142	0.592029	0.709427	0.60725	0.607116	0.579552	0.534697

## Sheet: meknes
Years	GrainYield	18/12/	26/12/	03/01/	08/01/	16/01/	24/01/	01/02/	09/02/	17/02/	25/02/	05/03/	13/03/	21/03/	29/03/	06/04/	14/04/	22/04/	30/04/	08/05/	16/05/	24/05/	01/06/
2000-2001	15.1992	0.468	0.551	0.554	0.587	0.607	0.642	0.653	0.676	0.634	0.676	0.671	0.64	0.632	0.563	0.473	0.452	0.453	0.351	0.329	0.295	0.251	0.232
2001-2002	10.4643	0.271	0.298	0.324	0.338	0.404	0.433	0.456	0.444	0.425	0.404	0.406	0.478	0.546	0.443	0.48	0.542	0.528	0.51	0.53	0.325	0.301	0.265
2002-2003	21.1087	0.53	0.56	0.615	0.615	0.613	0.631	0.633	0.663	0.675	0.666	0.663	0.719	0.672	0.648	0.565	0.587	0.642	0.533	0.523	0.394	0.339	0.3
2003-2004	20.8502	0.429	0.551	0.506	0.564	0.554	0.578	0.587	0.589	0.607	0.605	0.599	0.598	0.597	0.573	0.55	0.549	0.518	0.516	0.492	0.459	0.402	0.381
2004-2005	14.6667	0.429	0.472	0.49	0.496	0.536	0.537	0.547	0.548	0.537	0.644	0.564	0.563	0.581	0.536	0.516	0.544	0.467	0.386	0.336	0.263	0.244	0.231
2005-2006	27.7833	0.387	0.533	0.513	0.554	0.582	0.641	0.651	0.646	0.696	0.671	0.663	0.672	0.661	0.625	0.634	0.627	0.567	0.525	0.487	0.371	0.321	0.302
2006-2007	7.92119	0.325	0.329	0.344	0.348	0.355	0.403	0.384	0.487	0.524	0.524	0.48	0.433	0.467	0.468	0.467	0.503	0.528	0.47	0.471	0.38	0.356	0.309
2007-2008	18.7641	0.421	0.436	0.437	0.501	0.535	0.556	0.588	0.56	0.564	0.573	0.602	0.562	0.577	0.47	0.406	0.45	0.489	0.421	0.329	0.272	0.273	0.241
2008-2009	24.3117	0.447	0.437	0.529	0.546	0.579	0.6	0.635	0.606	0.611	0.656	0.638	0.61	0.604	0.593	0.561	0.568	0.596	0.516	0.467	0.358	0.334	0.309
2009-2010	18.468	0.389	0.457	0.457	0.477	0.457	0.549	0.578	0.648	0.663	0.645	0.68	0.648	0.652	0.592	0.534	0.542	0.531	0.471	0.43	0.364	0.344	0.307
2010-2011	23.9287	0.547	0.575	0.571	0.606	0.608	0.612	0.641	0.622	0.649	0.628	0.608	0.65	0.631	0.625	0.578	0.573	0.536	0.512	0.465	0.39	0.404	0.359
2011-2012	21.5103	0.457	0.469	0.498	0.514	0.547	0.585	0.608	0.577	0.579	0.575	0.57	0.554	0.535	0.613	0.565	0.579	0.558	0.532	0.527	0.327	0.308	0.268
2012-2013	31.1354	0.498	0.532	0.561	0.599	0.647	0.64	0.634	0.651	0.706	0.667	0.711	0.676	0.662	0.695	0.599	0.621	0.564	0.611	0.497	0.399	0.402	0.342
2013-2014	32.4568	0.372	0.42	0.42	0.516	0.569	0.575	0.612	0.595	0.64	0.656	0.65	0.638	0.625	0.664	0.619	0.606	0.653	0.55	0.447	0.317	0.306	0.273
2014-2015	41.9345	0.498	0.531	0.525	0.558	0.618	0.621	0.646	0.624	0.655	0.663	0.643	0.659	0.639	0.636	0.608	0.601	0.595	0.506	0.455	0.329	0.31	0.286
2015-2016	11.0618	0.307	0.308	0.331	0.332	0.332	0.313	0.314	0.302	0.318	0.334	0.34	0.358	0.399	0.396	0.463	0.506	0.51	0.538	0.493	0.389	0.354	0.292
2016-2017	29.5667	0.507	0.537	0.539	0.568	0.629	0.615	0.686	0.688	0.678	0.738	0.69	0.669	0.663	0.596	0.537	0.553	0.486	0.406	0.373	0.266	0.246	0.236
2017-2018	31.8333	0.303	0.37	0.373	0.427	0.472	0.508	0.556	0.563	0.586	0.64	0.65	0.672	0.676	0.65	0.677	0.679	0.623	0.616	0.58	0.496	0.457	0.4
2018-2019	24.6667	0.522	0.535	0.544	0.537	0.598	0.611	0.622	0.635	0.618	0.635	0.615	0.583	0.552	0.594	0.517	0.512	0.52	0.445	0.413	0.318	0.286	0.271
2019-2020	12.6367	0.528	0.55	0.551	0.564	0.552	0.594	0.589	0.576	0.56	0.511	0.481	0.447	0.473	0.484	0.417	0.481	0.455	0.461	0.417	0.317	0.289	0.27

## Sheet: MLyaacoub
Years	GrainYield	18/12/	26/12/	03/01/	08/01/	16/01/	24/01/	01/02/	09/02/	17/02/	25/02/	05/03/	13/03/	21/03/	29/03/	06/04/	14/04/	22/04/	30/04/	08/05/	16/05/	24/05/	01/06/
2000-2001	11.2001	0.408	0.501	0.503	0.526	0.569	0.617	0.621	0.642	0.61	0.656	0.665	0.634	0.616	0.52	0.556	0.466	0.481	0.346	0.314	0.251	0.211	0.217
2001-2002	6.83367	0.225	0.251	0.256	0.282	0.325	0.36	0.399	0.39	0.382	0.361	0.355	0.413	0.4	0.363	0.327	0.385	0.37	0.369	0.405	0.268	0.245	0.243
2002-2003	20.9257	0.483	0.518	0.541	0.57	0.573	0.59	0.602	0.609	0.652	0.645	0.65	0.661	0.644	0.638	0.654	0.589	0.636	0.525	0.498	0.348	0.306	0.303
2003-2004	18.2449	0.373	0.493	0.445	0.502	0.502	0.541	0.559	0.548	0.589	0.592	0.574	0.59	0.572	0.553	0.564	0.52	0.49	0.479	0.477	0.386	0.32	0.317
2004-2005	10.4667	0.386	0.413	0.427	0.45	0.472	0.466	0.477	0.471	0.473	0.573	0.515	0.521	0.511	0.485	0.506	0.467	0.386	0.329	0.289	0.213	0.202	0.204
2005-2006	24.631	0.332	0.426	0.425	0.471	0.51	0.579	0.591	0.572	0.683	0.631	0.628	0.651	0.632	0.616	0.616	0.611	0.594	0.513	0.46	0.318	0.266	0.268
2006-2007	2.83311	0.271	0.272	0.277	0.265	0.287	0.336	0.372	0.316	0.467	0.443	0.443	0.371	0.38	0.42	0.396	0.383	0.424	0.395	0.399	0.305	0.267	0.26
2007-2008	18.1567	0.369	0.374	0.375	0.427	0.494	0.517	0.531	0.534	0.536	0.55	0.578	0.548	0.542	0.486	0.496	0.419	0.391	0.367	0.27	0.234	0.234	0.231
2008-2009	22.1739	0.397	0.4	0.483	0.496	0.535	0.555	0.598	0.602	0.57	0.619	0.616	0.589	0.56	0.573	0.584	0.559	0.585	0.528	0.435	0.312	0.295	0.297
2009-2010	20.7028	0.313	0.348	0.356	0.377	0.39	0.454	0.507	0.498	0.56	0.594	0.654	0.601	0.587	0.587	0.602	0.532	0.565	0.496	0.462	0.331	0.308	0.312
2010-2011	16.1343	0.461	0.48	0.481	0.54	0.554	0.557	0.59	0.595	0.622	0.598	0.583	0.634	0.654	0.609	0.615	0.559	0.517	0.466	0.41	0.334	0.348	0.332
2011-2012	11.7171	0.397	0.409	0.431	0.446	0.483	0.519	0.536	0.533	0.507	0.488	0.478	0.455	0.428	0.508	0.52	0.545	0.453	0.399	0.384	0.26	0.244	0.245
2012-2013	26.6802	0.485	0.523	0.557	0.593	0.633	0.641	0.633	0.63	0.675	0.664	0.709	0.673	0.683	0.69	0.698	0.608	0.56	0.573	0.479	0.356	0.362	0.357
2013-2014	21.7016	0.296	0.325	0.325	0.422	0.48	0.499	0.538	0.536	0.599	0.662	0.607	0.595	0.581	0.627	0.622	0.569	0.565	0.489	0.373	0.266	0.26	0.253
2014-2015	28.2455	0.457	0.494	0.478	0.493	0.574	0.583	0.61	0.61	0.622	0.63	0.621	0.645	0.638	0.605	0.61	0.566	0.502	0.425	0.351	0.263	0.246	0.24
2015-2016	6.59257	0.227	0.228	0.268	0.272	0.27	0.226	0.284	0.276	0.23	0.246	0.256	0.28	0.345	0.336	0.321	0.385	0.433	0.423	0.383	0.299	0.27	0.26
2016-2017	24.0667	0.428	0.455	0.456	0.48	0.558	0.546	0.613	0.615	0.656	0.68	0.632	0.607	0.601	0.528	0.532	0.458	0.319	0.328	0.281	0.216	0.201	0.195
2017-2018	25.0733	0.264	0.329	0.329	0.384	0.451	0.474	0.543	0.534	0.572	0.613	0.64	0.67	0.634	0.631	0.634	0.69	0.615	0.599	0.528	0.447	0.372	0.359
2018-2019	20.6247	0.473	0.487	0.488	0.486	0.521	0.563	0.597	0.582	0.598	0.611	0.572	0.548	0.506	0.56	0.572	0.46	0.453	0.383	0.358	0.281	0.242	0.236
2019-2020	9.2	0.436	0.457	0.458	0.468	0.493	0.522	0.498	0.482	0.464	0.399	0.369	0.351	0.349	0.353	0.347	0.316	0.344	0.306	0.279	0.254	0.23	0.223

## Sheet: taza
Years	GrainYield	18/12/	26/12/	03/01/	08/01/	16/01/	24/01/	01/02/	09/02/	17/02/	25/02/	05/03/	13/03/	21/03/	29/03/	06/04/	14/04/	22/04/	30/04/	08/05/	16/05/	24/05/	01/06/
2000-2001	33.6667	0.438	0.471	0.54	0.542	0.583	0.609	0.632	0.621	0.67	0.639	0.725	0.678	0.666	0.632	0.577	0.501	0.472	0.374	0.354	0.299	0.279	0.248
2001-2002	3.33333	0.31	0.312	0.288	0.275	0.303	0.357	0.349	0.354	0.359	0.383	0.361	0.392	0.413	0.37	0.345	0.34	0.381	0.37	0.401	0.371	0.323	0.281
2002/03	27.3333	0.386	0.476	0.543	0.545	0.608	0.59	0.602	0.638	0.637	0.653	0.666	0.683	0.669	0.619	0.686	0.623	0.585	0.485	0.407	0.35	0.278	0.218
2003/04	24.6667	0.328	0.354	0.439	0.405	0.456	0.475	0.542	0.523	0.565	0.622	0.565	0.583	0.607	0.612	0.574	0.534	0.57	0.461	0.528	0.354	0.354	0.27
2004/05	14	0.304	0.351	0.389	0.389	0.404	0.434	0.454	0.449	0.458	0.447	0.524	0.526	0.551	0.563	0.517	0.476	0.442	0.346	0.261	0.24	0.204	0.186
2005/06	20.3333	0.294	0.37	0.424	0.427	0.519	0.508	0.597	0.558	0.563	0.631	0.63	0.601	0.609	0.63	0.631	0.629	0.556	0.475	0.423	0.315	0.26	0.237
2006/07	1.5	0.222	0.236	0.217	0.229	0.217	0.216	0.271	0.277	0.273	0.343	0.315	0.301	0.281	0.275	0.283	0.31	0.326	0.351	0.358	0.321	0.262	0.231
2007/08	14	0.265	0.332	0.366	0.387	0.405	0.466	0.511	0.518	0.511	0.554	0.548	0.572	0.574	0.574	0.501	0.489	0.395	0.31	0.237	0.225	0.193	0.197
2008/09	20	0.354	0.384	0.395	0.53	0.487	0.552	0.557	0.611	0.572	0.555	0.565	0.611	0.589	0.534	0.573	0.556	0.571	0.495	0.399	0.341	0.291	0.235
2009/10	24.3333	0.187	0.269	0.263	0.281	0.392	0.375	0.45	0.503	0.563	0.556	0.599	0.696	0.607	0.587	0.549	0.561	0.512	0.473	0.47	0.382	0.335	0.248
2010/11	17.3333	0.413	0.508	0.536	0.551	0.607	0.61	0.672	0.627	0.614	0.646	0.631	0.619	0.696	0.624	0.614	0.541	0.473	0.419	0.369	0.294	0.281	0.245
2011/12	12.6667	0.337	0.407	0.433	0.468	0.48	0.526	0.558	0.57	0.558	0.563	0.569	0.554	0.515	0.484	0.563	0.483	0.501	0.441	0.409	0.291	0.256	0.208
2012/13	15.6667	0.427	0.462	0.509	0.556	0.613	0.611	0.625	0.632	0.627	0.671	0.683	0.705	0.688	0.663	0.739	0.626	0.527	0.538	0.42	0.395	0.288	0.26
2013/14	19.1667	0.236	0.274	0.341	0.348	0.441	0.547	0.54	0.628	0.588	0.624	0.622	0.611	0.597	0.624	0.586	0.563	0.534	0.464	0.355	0.27	0.248	0.209
2014/15	24.3333	0.439	0.436	0.463	0.486	0.499	0.615	0.576	0.612	0.585	0.649	0.626	0.598	0.679	0.665	0.612	0.593	0.515	0.417	0.327	0.243	0.222	0.206
2015/16	0.666667	0.196	0.194	0.193	0.197	0.216	0.2	0.198	0.201	0.326	0.2	0.205	0.222	0.247	0.295	0.319	0.38	0.417	0.376	0.355	0.302	0.254	0.225
2016/17	26.6667	0.347	0.436	0.457	0.473	0.539	0.558	0.601	0.648	0.671	0.631	0.723	0.703	0.627	0.669	0.589	0.503	0.385	0.306	0.256	0.232	0.198	0.187
2017/18	22.3333	0.219	0.231	0.294	0.312	0.418	0.449	0.542	0.547	0.544	0.583	0.646	0.664	0.681	0.641	0.617	0.677	0.595	0.635	0.515	0.446	0.358	0.305
2018/19	12.6667	0.433	0.456	0.485	0.488	0.485	0.53	0.567	0.575	0.505	0.572	0.583	0.552	0.527	0.474	0.537	0.443	0.489	0.345	0.309	0.266	0.239	0.203
2019/20	13.3333	0.403	0.456	0.471	0.479	0.498	0.523	0.525	0.502	0.479	0.461	0.4	0.37	0.365	0.313	0.335	0.354	0.327	0.331	0.291	0.267	0.238	0.198

## Sheet: ifrane
Years	GrainYield	18/12/	26/12/	03/01/	08/01/	16/01/	24/01/	01/02/	09/02/	17/02/	25/02/	05/03/	13/03/	21/03/	29/03/	06/04/	14/04/	22/04/	30/04/	08/05/	16/05/	24/05/	01/06/
2000-2001	8.73459	0.387	0.386	0.396	0.407	0.417	0.399	0.42	0.404	0.42	0.399	0.402	0.332	0.372	0.441	0.4	0.411	0.442	0.36	0.361	0.334	0.324	0.306
2001-2002	16.3747	0.29	0.305	0.319	0.313	0.318	0.333	0.317	0.324	0.315	0.341	0.375	0.305	0.345	0.457	0.421	0.419	0.415	0.421	0.421	0.446	0.379	0.365
2002-2003	18.2565	0.386	0.406	0.423	0.405	0.403	0.404	0.398	0.412	0.411	0.433	0.524	0.454	0.494	0.488	0.51	0.533	0.564	0.515	0.546	0.497	0.466	0.432
2003-2004	17.7448	0.398	0.34	0.449	0.432	0.432	0.428	0.426	0.422	0.422	0.44	0.441	0.371	0.411	0.452	0.44	0.5	0.481	0.495	0.445	0.466	0.495	0.454
2004-2005	7.53333	0.386	0.395	0.371	0.368	0.368	0.38	0.371	0.36	0.375	0.372	0.358	0.288	0.328	0.445	0.339	0.438	0.398	0.353	0.339	0.316	0.29	0.283
2005-2006	16.5205	0.358	0.353	0.405	0.396	0.404	0.392	0.382	0.433	0.417	0.411	0.415	0.345	0.385	0.449	0.481	0.479	0.455	0.481	0.481	0.454	0.407	0.379
2006-2007	5.97385	0.329	0.333	0.326	0.32	0.314	0.33	0.299	0.375	0.379	0.398	0.387	0.3	0.357	0.366	0.42	0.423	0.427	0.41	0.417	0.406	0.407	0.361
2007-2008	15.7581	0.35	0.372	0.372	0.342	0.357	0.372	0.384	0.392	0.373	0.399	0.39	0.38	0.36	0.453	0.48	0.405	0.43	0.42	0.364	0.384	0.4	0.42
2008-2009	17.9901	0.342	0.34	0.333	0.384	0.386	0.373	0.384	0.416	0.389	0.45	0.437	0.367	0.407	0.453	0.47	0.483	0.477	0.47	0.47	0.449	0.405	0.384
2009-2010	16.7997	0.429	0.371	0.47	0.477	0.445	0.437	0.432	0.473	0.505	0.467	0.475	0.405	0.445	0.481	0.48	0.482	0.515	0.499	0.48	0.441	0.427	0.398
2010-2011	15.1721	0.499	0.425	0.486	0.495	0.485	0.471	0.469	0.486	0.488	0.484	0.413	0.343	0.35	0.498	0.496	0.473	0.453	0.49	0.496	0.495	0.492	0.499
2011-2012	14.0677	0.41	0.434	0.425	0.423	0.411	0.402	0.414	0.425	0.398	0.394	0.427	0.38	0.397	0.392	0.46	0.464	0.467	0.461	0.472	0.452	0.414	0.388
2012-2013	17.3612	0.398	0.412	0.419	0.422	0.426	0.469	0.433	0.433	0.445	0.513	0.484	0.414	0.454	0.519	0.484	0.528	0.524	0.552	0.484	0.498	0.45	0.415
2013-2014	19.1708	0.377	0.36	0.389	0.388	0.426	0.403	0.42	0.422	0.409	0.463	0.446	0.376	0.416	0.464	0.444	0.486	0.486	0.497	0.444	0.414	0.4	0.361
2014-2015	15	0.358	0.403	0.431	0.421	0.441	0.475	0.484	0.498	0.498	0.512	0.41	0.38	0.38	0.49	0.446	0.548	0.45	0.497	0.446	0.377	0.336	0.42
2015-2016	11	0.3	0.301	0.292	0.313	0.332	0.319	0.309	0.309	0.302	0.322	0.407	0.337	0.377	0.396	0.425	0.43	0.447	0.445	0.425	0.431	0.39	0.372
2016-2017	12	0.38	0.411	0.416	0.415	0.422	0.423	0.457	0.489	0.514	0.545	0.424	0.4	0.394	0.5	0.42	0.464	0.464	0.443	0.414	0.349	0.316	0.285
2017-2018	15	0.291	0.291	0.329	0.336	0.366	0.384	0.402	0.494	0.426	0.441	0.488	0.418	0.458	0.5	0.45	0.528	0.528	0.548	0.533	0.513	0.42	0.483
2018-2019	14	0.49	0.489	0.486	0.472	0.46	0.49	0.494	0.497	0.522	0.504	0.446	0.376	0.416	0.473	0.425	0.486	0.486	0.448	0.425	0.356	0.39	0.299
2019-2020	14	0.384	0.405	0.424	0.424	0.432	0.429	0.474	0.472	0.482	0.485	0.43	0.36	0.4	0.484	0.46	0.467	0.47	0.523	0.461	0.408	0.4	0.355

## Sheet: boulmane
Years	GrainYield	18/12/	26/12/	03/01/	08/01/	16/01/	24/01/	01/02/	09/02/	17/02/	25/02/	05/03/	13/03/	21/03/	29/03/	06/04/	14/04/	22/04/	30/04/	08/05/	16/05/	24/05/	01/06/
2000-2001	8.03828	0.242	0.259	0.25	0.256	0.249	0.254	0.241	0.247	0.254	0.251	0.255	0.263	0.26	0.255	0.255	0.238	0.245	0.248	0.233	0.228	0.245	0.245
2001-2002	8.66456	0.255	0.256	0.228	0.201	0.235	0.235	0.233	0.234	0.245	0.277	0.248	0.251	0.19	0.255	0.26	0.255	0.25	0.265	0.276	0.265	0.26	0.238
2002-2003	12.5624	0.266	0.258	0.254	0.294	0.285	0.252	0.261	0.256	0.267	0.257	0.264	0.256	0.282	0.278	0.29	0.295	0.306	0.282	0.283	0.276	0.306	0.254
2003-2004	12.8679	0.264	0.27	0.27	0.271	0.269	0.273	0.268	0.275	0.277	0.281	0.269	0.279	0.272	0.275	0.298	0.286	0.288	0.277	0.289	0.295	0.288	0.259
2004-2005	4.4	0.269	0.38	0.334	0.273	0.254	0.292	0.25	0.254	0.246	0.27	0.262	0.237	0.265	0.262	0.28	0.257	0.254	0.24	0.237	0.226	0.254	0.252
2005-2006	12.5794	0.226	0.256	0.248	0.275	0.27	0.27	0.288	0.246	0.248	0.252	0.249	0.256	0.268	0.27	0.287	0.278	0.298	0.303	0.294	0.288	0.298	0.239
2006-2007	7.44062	0.252	0.242	0.237	0.235	0.235	0.253	0.264	0.251	0.25	0.242	0.253	0.238	0.239	0.239	0.247	0.241	0.247	0.25	0.263	0.257	0.25	0.243
2007-2008	15.7552	0.262	0.271	0.26	0.283	0.262	0.26	0.26	0.252	0.278	0.266	0.273	0.261	0.285	0.274	0.27	0.268	0.274	0.247	0.269	0.265	0.274	0.263
2008-2009	13.9214	0.326	0.283	0.298	0.338	0.319	0.299	0.323	0.291	0.292	0.202	0.303	0.299	0.307	0.313	0.317	0.314	0.309	0.312	0.297	0.279	0.309	0.293
2009-2010	15.5398	0.321	0.298	0.3	0.23	0.23	0.304	0.311	0.348	0.23	0.35	0.312	0.311	0.31	0.321	0.31	0.337	0.322	0.322	0.307	0.307	0.322	0.302
2010-2011	11.1177	0.301	0.311	0.315	0.306	0.303	0.294	0.316	0.299	0.302	0.295	0.287	0.304	0.293	0.297	0.283	0.28	0.295	0.302	0.305	0.308	0.295	0.277
2011-2012	10.4536	0.303	0.291	0.31	0.281	0.298	0.299	0.304	0.272	0.268	0.268	0.264	0.26	0.265	0.286	0.293	0.3	0.288	0.294	0.286	0.286	0.3	0.254
2012-2013	16.6434	0.282	0.308	0.29	0.3	0.347	0.289	0.291	0.285	0.313	0.285	0.31	0.304	0.316	0.33	0.317	0.313	0.325	0.306	0.319	0.299	0.325	0.31
2013-2014	13.6149	0.283	0.274	0.274	0.286	0.291	0.285	0.28	0.284	0.288	0.278	0.278	0.29	0.283	0.299	0.286	0.284	0.287	0.268	0.266	0.258	0.3	0.268
2014-2015	12.5	0.277	0.268	0.317	0.25	0.304	0.264	0.292	0.272	0.275	0.259	0.266	0.276	0.285	0.285	0.283	0.284	0.288	0.289	0.273	0.265	0.288	0.256
2015-2016	11	0.253	0.256	0.264	0.282	0.257	0.247	0.249	0.242	0.24	0.242	0.254	0.239	0.251	0.241	0.252	0.243	0.255	0.255	0.261	0.25	0.255	0.244
2016-2017	10	0.264	0.251	0.251	0.253	0.23	0.256	0.252	0.257	0.261	0.265	0.258	0.264	0.273	0.261	0.259	0.256	0.254	0.256	0.245	0.233	0.254	0.248
2017-2018	13	0.23	0.232	0.225	0.242	0.232	0.216	0.234	0.228	0.229	0.238	0.232	0.224	0.233	0.237	0.282	0.245	0.267	0.273	0.263	0.278	0.29	0.222
2018-2019	14	0.295	0.295	0.314	0.283	0.278	0.286	0.28	0.281	0.277	0.276	0.274	0.272	0.265	0.286	0.273	0.276	0.281	0.284	0.266	0.261	0.281	0.25
2019-2020	10	0.269	0.27	0.269	0.271	0.27	0.276	0.268	0.273	0.269	0.263	0.263	0.22	0.276	0.286	0.268	0.275	0.301	0.279	0.278	0.277	0.23	0.253

## Sheet: Elhajeb
Years	GrainYield	18/12/	26/12/	03/01/	08/01/	16/01/	24/01/	01/02/	09/02/	17/02/	25/02/	05/03/	13/03/	21/03/	29/03/	06/04/	14/04/	22/04/	30/04/	08/05/	16/05/	24/05/
2000-2001	17.7981	0.421	0.504	0.504	0.559	0.547	0.505	0.537	0.55	0.61	0.656	0.596	0.543	0.533	0.48	0.543	0.427	0.456	0.346	0.337	0.292	0.296
2001-2002	15	0.257	0.287	0.298	0.31	0.306	0.339	0.395	0.35	0.382	0.361	0.35	0.463	0.429	0.441	0.463	0.465	0.458	0.465	0.485	0.355	0.364
2002-2003	22.043	0.379	0.481	0.479	0.514	0.482	0.476	0.515	0.549	0.652	0.645	0.585	0.544	0.508	0.595	0.544	0.546	0.639	0.574	0.583	0.411	0.451
2003-2004	19.0938	0.429	0.518	0.473	0.491	0.479	0.473	0.505	0.488	0.589	0.592	0.532	0.537	0.523	0.52	0.537	0.522	0.503	0.508	0.468	0.453	0.489
2004-2005	3.6	0.39	0.436	0.444	0.44	0.42	0.428	0.466	0.411	0.411	0.494	0.434	0.465	0.44	0.503	0.465	0.428	0.404	0.338	0.323	0.276	0.272
2005-2006	17.4	0.338	0.429	0.423	0.454	0.44	0.446	0.508	0.512	0.683	0.631	0.571	0.549	0.52	0.538	0.549	0.539	0.496	0.492	0.48	0.344	0.353
2006-2007	2.1	0.296	0.342	0.349	0.346	0.329	0.349	0.37	0.256	0.256	0.443	0.41	0.424	0.401	0.436	0.424	0.439	0.479	0.447	0.451	0.373	0.388
2007-2008	11.4804	0.329	0.386	0.383	0.413	0.388	0.403	0.468	0.474	0.49	0.49	0.47	0.482	0.451	0.464	0.482	0.402	0.363	0.388	0.317	0.302	0.3
2008-2009	24.5464	0.407	0.38	0.455	0.459	0.439	0.439	0.522	0.53	0.57	0.619	0.559	0.535	0.517	0.568	0.535	0.53	0.529	0.496	0.476	0.349	0.363
2009-2010	20.6082	0.377	0.478	0.482	0.475	0.478	0.467	0.534	0.534	0.56	0.594	0.534	0.575	0.568	0.566	0.575	0.516	0.534	0.488	0.454	0.355	0.36
2010-2011	17.3998	0.506	0.528	0.526	0.546	0.537	0.525	0.562	0.562	0.6	0.5	0.49	0.574	0.568	0.562	0.574	0.527	0.488	0.511	0.481	0.419	0.441
2011-2012	15.9493	0.393	0.445	0.449	0.453	0.44	0.449	0.518	0.473	0.507	0.488	0.45	0.465	0.451	0.539	0.465	0.551	0.496	0.49	0.524	0.374	0.391
2012-2013	23.6202	0.403	0.436	0.451	0.466	0.448	0.532	0.507	0.57	0.58	0.664	0.604	0.597	0.573	0.65	0.597	0.588	0.557	0.6	0.486	0.39	0.402
2013-2014	24.5703	0.314	0.376	0.376	0.46	0.429	0.437	0.514	0.476	0.599	0.662	0.602	0.539	0.515	0.563	0.539	0.515	0.528	0.494	0.425	0.327	0.327
2014-2015	27.192	0.358	0.452	0.447	0.462	0.441	0.475	0.523	0.54	0.622	0.63	0.61	0.553	0.528	0.546	0.553	0.548	0.529	0.497	0.446	0.33	0.336
2015-2016	11.5336	0.3	0.305	0.328	0.342	0.332	0.319	0.323	0.33	0.33	0.374	0.36	0.374	0.354	0.404	0.374	0.43	0.447	0.445	0.425	0.389	0.39
2016-2017	27.3	0.38	0.456	0.455	0.46	0.422	0.423	0.523	0.555	0.656	0.68	0.62	0.576	0.557	0.539	0.576	0.521	0.485	0.443	0.414	0.316	0.316
2017-2018	31.3	0.291	0.34	0.345	0.377	0.366	0.384	0.496	0.474	0.572	0.613	0.553	0.545	0.519	0.573	0.545	0.59	0.531	0.548	0.533	0.508	0.516
2018-2019	21	0.49	0.49	0.475	0.463	0.46	0.49	0.504	0.522	0.598	0.611	0.551	0.487	0.482	0.537	0.487	0.47	0.488	0.448	0.425	0.335	0.334
2019-2020	15.9117	0.384	0.453	0.453	0.46	0.432	0.429	0.499	0.422	0.464	0.466	0.42	0.43	0.428	0.519	0.43	0.467	0.47	0.523	0.461	0.373	0.391

## Sheet: taounate
Years	GrainYield	18/12/	26/12/	03/01/	08/01/	16/01/	24/01/	01/02/	09/02/	17/02/	25/02/	05/03/	13/03/	21/03/	29/03/	06/04/	14/04/	22/04/	30/04/	08/05/	16/05/	24/05/	01/06/
2000-2001	15.1668	0.489	0.566	0.573	0.611	0.629	0.669	0.651	0.687	0.645	0.699	0.692	0.674	0.67	0.603	0.535	0.52	0.42	0.44	0.437	0.427	0.411	0.36
2001-2002	8.0669	0.245	0.239	0.251	0.269	0.298	0.356	0.391	0.404	0.426	0.402	0.419	0.497	0.497	0.466	0.509	0.45	0.464	0.491	0.533	0.523	0.433	0.402
2002-2003	17.5399	0.557	0.598	0.599	0.628	0.65	0.633	0.639	0.681	0.684	0.666	0.663	0.647	0.645	0.651	0.582	0.482	0.542	0.524	0.525	0.494	0.47	0.445
2003-2004	17.7667	0.387	0.517	0.459	0.52	0.511	0.556	0.57	0.593	0.62	0.609	0.595	0.622	0.609	0.62	0.594	0.577	0.552	0.576	0.594	0.507	0.539	0.503
2004-2005	11.3	0.383	0.406	0.415	0.443	0.463	0.462	0.477	0.482	0.478	0.61	0.557	0.558	0.555	0.54	0.488	0.482	0.367	0.392	0.39	0.34	0.318	0.3
2005-2006	23.1167	0.363	0.516	0.487	0.537	0.571	0.661	0.667	0.627	0.733	0.661	0.678	0.704	0.681	0.663	0.647	0.571	0.551	0.539	0.531	0.451	0.403	0.363
2006-2007	4.30434	0.281	0.286	0.294	0.288	0.299	0.34	0.398	0.419	0.485	0.475	0.494	0.418	0.416	0.474	0.471	0.46	0.47	0.509	0.493	0.493	0.439	0.4
2007-2008	18.7223	0.367	0.389	0.403	0.465	0.518	0.538	0.58	0.588	0.611	0.602	0.642	0.619	0.612	0.559	0.483	0.5	0.455	0.527	0.457	0.478	0.45	0.452
2008-2009	19.8853	0.41	0.418	0.543	0.522	0.567	0.587	0.64	0.591	0.594	0.655	0.637	0.608	0.585	0.595	0.577	0.534	0.58	0.562	0.506	0.483	0.432	0.414
2009-2010	14.7055	0.314	0.374	0.378	0.373	0.379	0.45	0.498	0.573	0.537	0.605	0.622	0.594	0.58	0.601	0.541	0.538	0.523	0.485	0.485	0.433	0.411	0.39
2010-2011	17.4825	0.542	0.582	0.571	0.612	0.603	0.609	0.648	0.625	0.674	0.645	0.62	0.67	0.666	0.634	0.579	0.525	0.498	0.531	0.535	0.515	0.493	0.498
2011-2012	11.1334	0.385	0.407	0.438	0.456	0.499	0.544	0.567	0.549	0.554	0.551	0.559	0.547	0.512	0.619	0.569	0.478	0.457	0.45	0.485	0.444	0.444	0.406
2012-2013	16.7635	0.517	0.551	0.58	0.62	0.651	0.66	0.642	0.667	0.722	0.668	0.711	0.668	0.684	0.678	0.575	0.549	0.575	0.58	0.518	0.51	0.49	0.496
2013-2014	17.7513	0.291	0.326	0.327	0.414	0.504	0.52	0.551	0.55	0.627	0.683	0.636	0.624	0.624	0.689	0.647	0.55	0.611	0.552	0.496	0.473	0.413	0.418
2014-2015	19.0597	0.475	0.511	0.493	0.499	0.604	0.626	0.627	0.597	0.682	0.658	0.657	0.691	0.68	0.681	0.621	0.569	0.496	0.527	0.516	0.466	0.445	0.395
2015-2016	4.88347	0.242	0.247	0.275	0.283	0.289	0.246	0.296	0.285	0.286	0.286	0.324	0.307	0.38	0.361	0.418	0.46	0.443	0.53	0.483	0.528	0.415	0.409
2016-2017	23.4	0.37	0.41	0.411	0.442	0.626	0.537	0.638	0.671	0.69	0.723	0.704	0.709	0.731	0.673	0.623	0.572	0.46	0.53	0.467	0.43	0.39	0.364
2017-2018	21.5667	0.266	0.354	0.356	0.412	0.478	0.51	0.549	0.568	0.603	0.655	0.667	0.682	0.663	0.636	0.71	0.631	0.598	0.573	0.545	0.521	0.513	0.489
2018-2019	19.0175	0.498	0.515	0.517	0.519	0.57	0.62	0.615	0.649	0.619	0.63	0.608	0.582	0.541	0.614	0.482	0.55	0.406	0.485	0.492	0.433	0.429	0.373
2019-2020	8.4582	0.483	0.519	0.52	0.541	0.557	0.615	0.605	0.602	0.608	0.561	0.533	0.516	0.503	0.483	0.429	0.552	0.39	0.56	0.519	0.479	0.488	0.453

## Sheet: sefrou
Years	GrainYield	18/12/	26/12/	03/01/	08/01/	16/01/	24/01/	01/02/	09/02/	17/02/	25/02/	05/03/	13/03/	21/03/	29/03/	06/04/	14/04/	22/04/	30/04/	08/05/	16/05/	24/05/	01/06/
2000-2001	11.2001	0.392	0.42	0.43	0.441	0.436	0.519	0.432	0.44	0.5	0.452	0.45	0.442	0.429	0.405	0.478	0.417	0.419	0.329	0.32	0.282	0.265	0.241
2001-2002	6.83367	0.271	0.316	0.303	0.28	0.326	0.333	0.323	0.343	0.3	0.339	0.358	0.34	0.339	0.339	0.346	0.393	0.398	0.391	0.438	0.339	0.311	0.297
2002-2003	20.9257	0.426	0.426	0.417	0.453	0.45	0.508	0.438	0.512	0.534	0.449	0.448	0.432	0.469	0.469	0.569	0.532	0.591	0.54	0.49	0.366	0.335	0.316
2003-2004	18.2449	0.395	0.381	0.406	0.414	0.412	0.447	0.426	0.484	0.496	0.451	0.44	0.458	0.443	0.442	0.514	0.493	0.497	0.49	0.534	0.41	0.378	0.374
2004-2005	10.4667	0.354	0.391	0.386	0.377	0.386	0.407	0.382	0.414	0.38	0.42	0.411	0.358	0.429	0.421	0.488	0.447	0.426	0.386	0.327	0.282	0.27	0.246
2005-2006	24.631	0.34	0.375	0.377	0.401	0.415	0.46	0.442	0.503	0.488	0.451	0.434	0.438	0.45	0.445	0.54	0.55	0.494	0.484	0.457	0.336	0.317	0.299
2006-2007	2.83311	0.279	0.321	0.323	0.315	0.327	0.341	0.351	0.33	0.428	0.386	0.383	0.355	0.349	0.376	0.414	0.443	0.446	0.438	0.433	0.346	0.327	0.316
2007-2008	18.1567	0.314	0.368	0.366	0.37	0.377	0.388	0.388	0.422	0.422	0.4	0.414	0.395	0.423	0.405	0.463	0.418	0.391	0.396	0.314	0.314	0.332	0.301
2008-2009	22.1739	0.437	0.39	0.433	0.455	0.442	0.476	0.487	0.527	0.5	0.524	0.47	0.459	0.454	0.469	0.537	0.521	0.515	0.465	0.434	0.334	0.323	0.303
2009-2010	20.7028	0.299	0.383	0.413	0.419	0.41	0.417	0.447	0.476	0.539	0.487	0.492	0.481	0.469	0.478	0.557	0.498	0.502	0.452	0.434	0.375	0.358	0.347
2010-2011	16.1343	0.492	0.473	0.468	0.478	0.472	0.539	0.497	0.564	0.543	0.478	0.46	0.494	0.469	0.473	0.551	0.485	0.443	0.425	0.403	0.397	0.395	0.375
2011-2012	10.3669	0.38	0.412	0.415	0.412	0.426	0.442	0.467	0.496	0.4	0.417	0.405	0.392	0.384	0.446	0.487	0.516	0.477	0.46	0.477	0.362	0.34	0.327
2012-2013	26.4916	0.402	0.416	0.428	0.438	0.512	0.561	0.447	0.498	0.516	0.473	0.519	0.5	0.515	0.54	0.629	0.571	0.526	0.533	0.44	0.37	0.362	0.365
2013-2014	18.6264	0.305	0.364	0.364	0.389	0.42	0.438	0.44	0.481	0.473	0.441	0.444	0.444	0.434	0.467	0.532	0.496	0.485	0.447	0.365	0.311	0.307	0.281
2014-2015	25.1472	0.353	0.402	0.421	0.392	0.446	0.476	0.455	0.506	0.489	0.442	0.443	0.458	0.469	0.468	0.556	0.54	0.532	0.46	0.395	0.319	0.308	0.277
2015-2016	9.23709	0.294	0.318	0.338	0.347	0.336	0.322	0.323	0.3	0.29	0.304	0.344	0.319	0.37	0.34	0.353	0.405	0.409	0.441	0.423	0.347	0.339	0.348
2016-2017	17.6037	0.411	0.407	0.406	0.407	0.42	0.46	0.437	0.499	0.526	0.464	0.451	0.445	0.462	0.423	0.487	0.443	0.394	0.356	0.332	0.288	0.281	0.251
2017-2018	27.1849	0.279	0.323	0.317	0.346	0.347	0.356	0.389	0.412	0.412	0.412	0.432	0.406	0.421	0.43	0.543	0.588	0.524	0.534	0.504	0.4	0.37	0.376
2018-2019	23.4594	0.457	0.44	0.433	0.423	0.416	0.452	0.449	0.493	0.507	0.444	0.434	0.422	0.402	0.483	0.523	0.45	0.451	0.427	0.401	0.326	0.299	0.275
2019-2020	11.013	0.383	0.409	0.409	0.412	0.428	0.442	0.421	0.453	0.39	0.391	0.383	0.368	0.407	0.397	0.411	0.404	0.428	0.411	0.387	0.359	0.342	0.311
